# Supplementary material
Source: PubMed Central journal article supplement (PMC10547234)

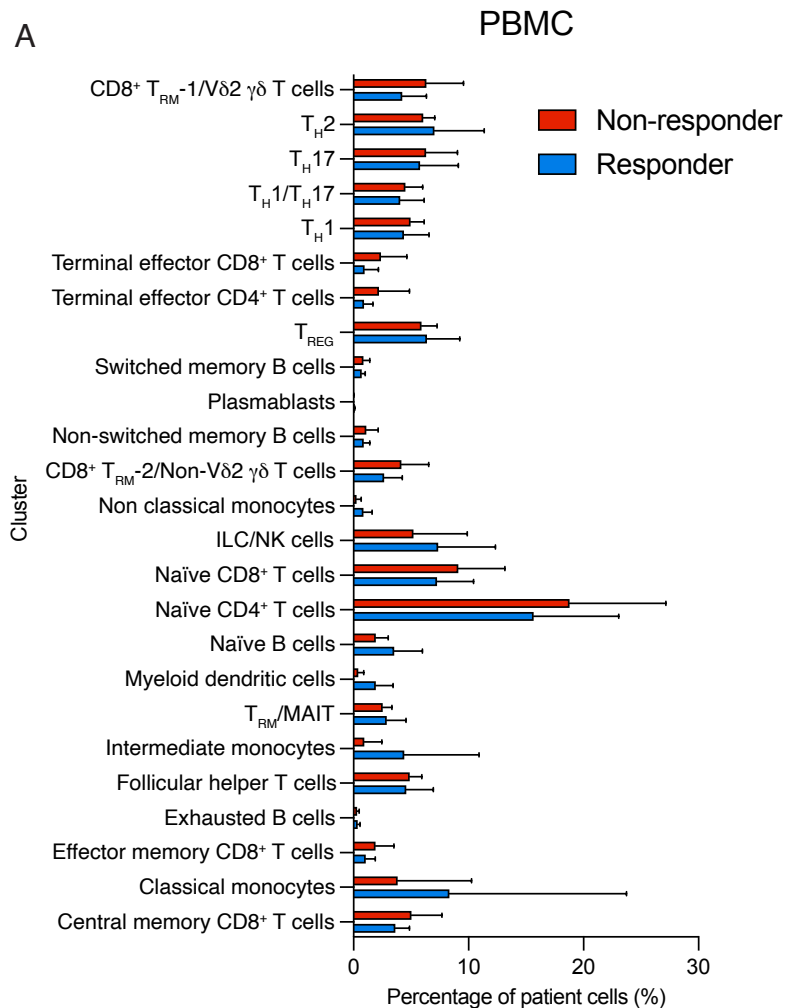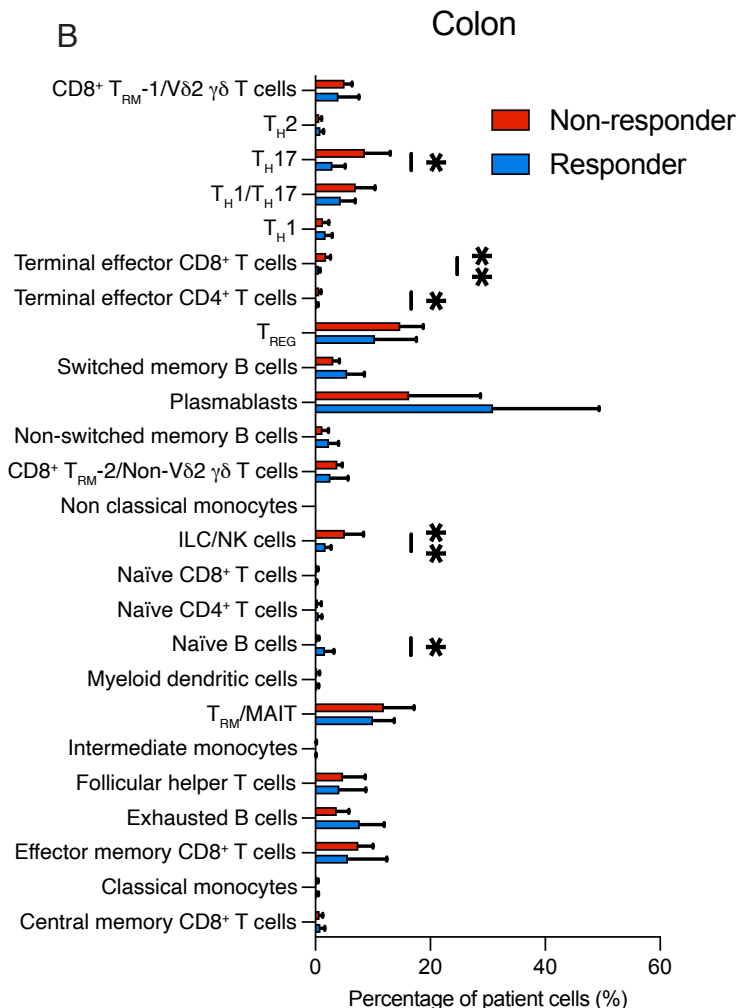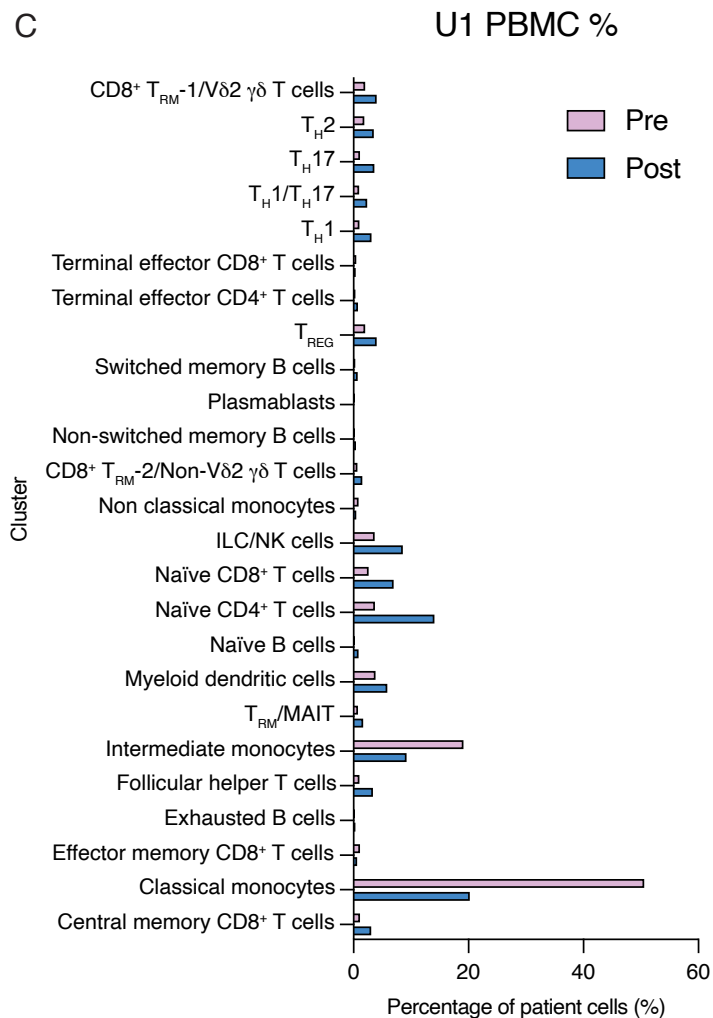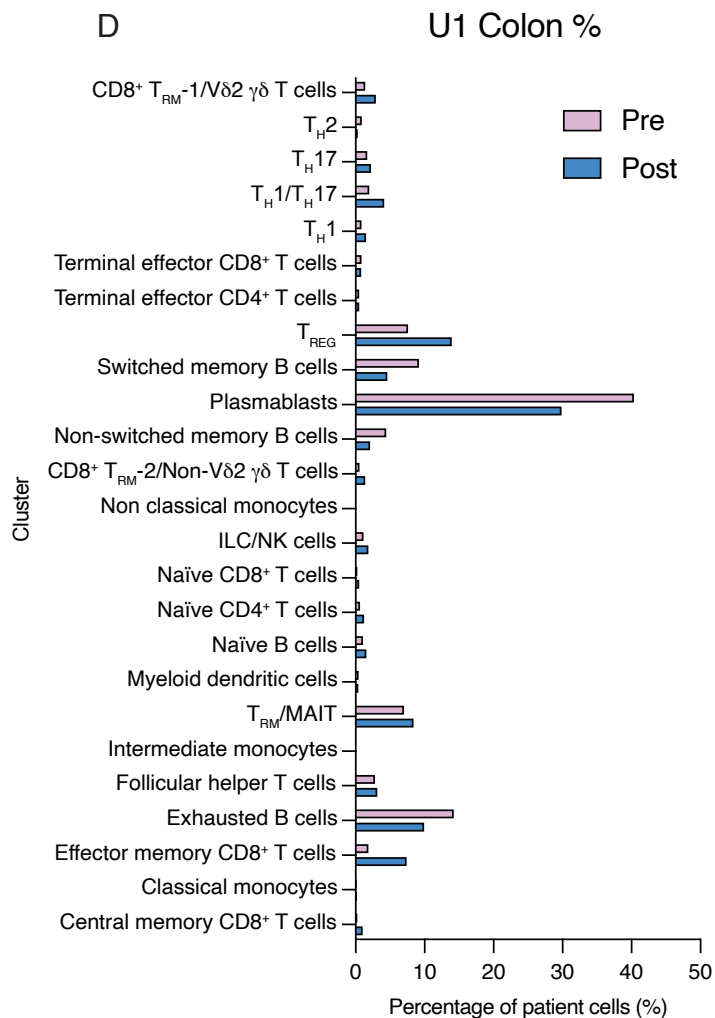

Supplement: izad084_suppl_supplementary_figure_s1.pdf [file izad084_suppl_supplementary_figure_s1.pdf]

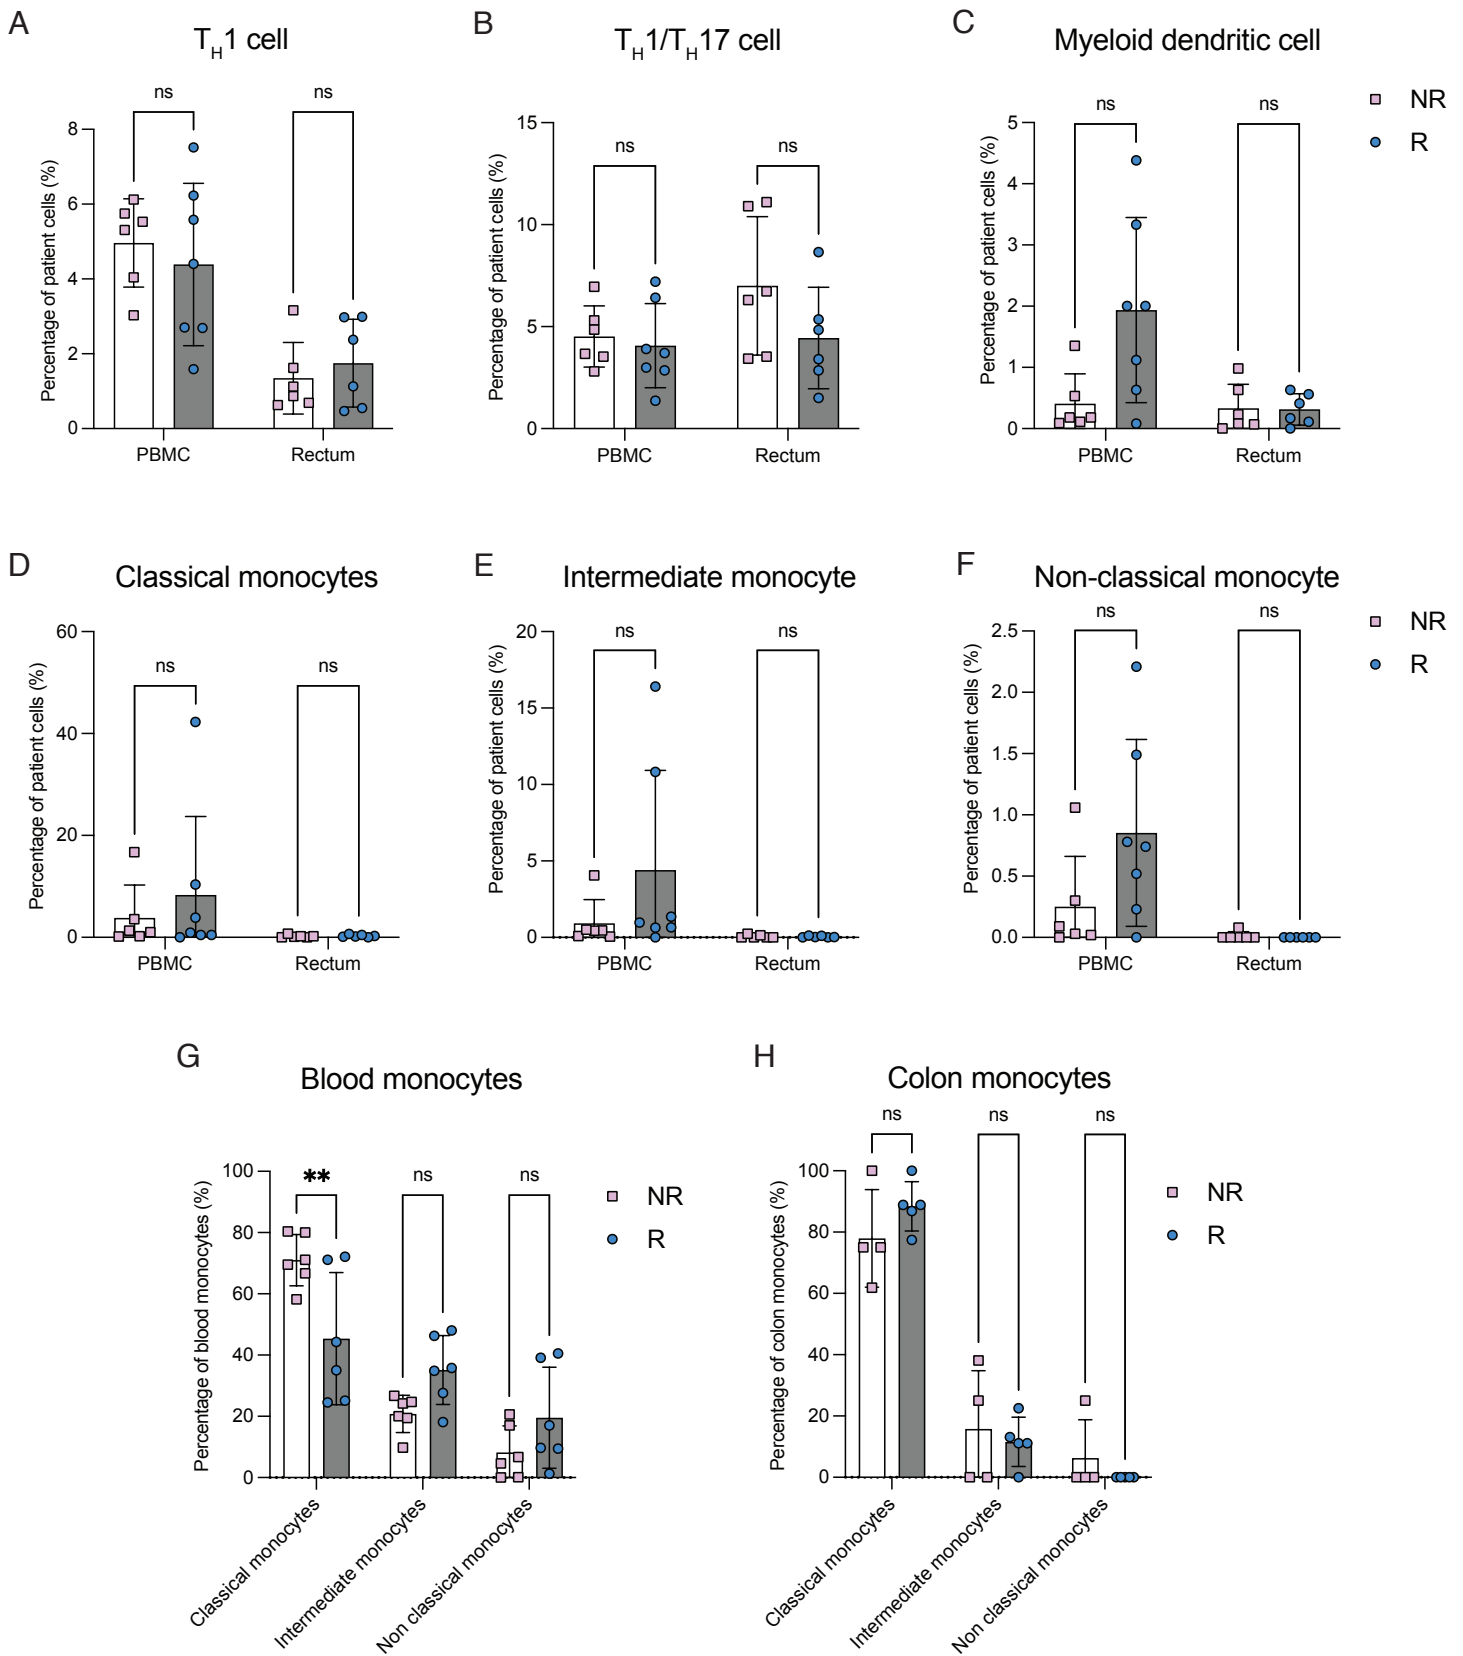

Supplement: izad084_suppl_supplementary_figure_s2.pdf [file izad084_suppl_supplementary_figure_s2.pdf]

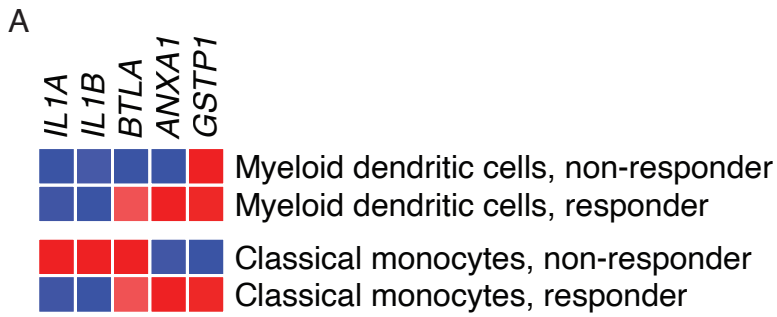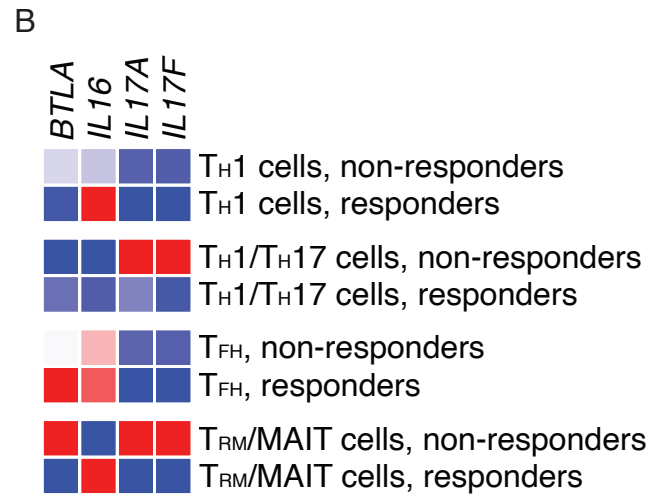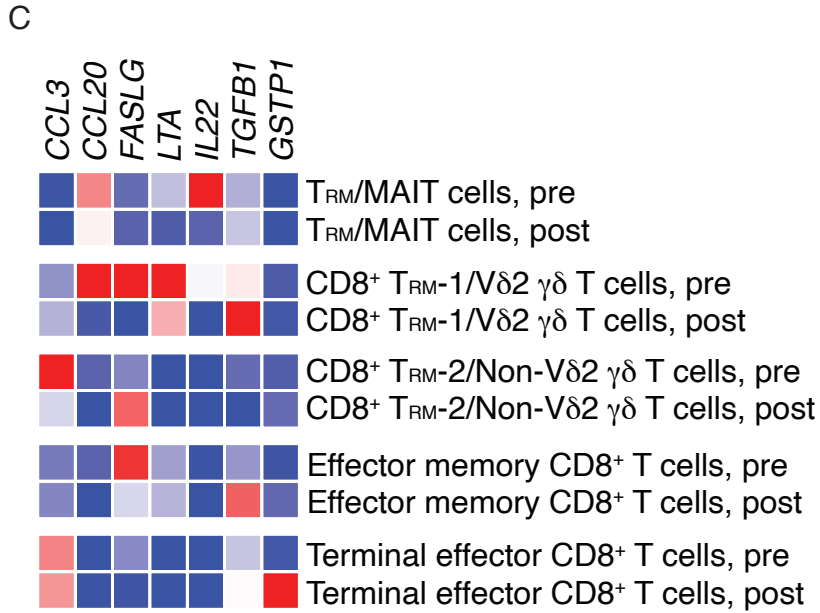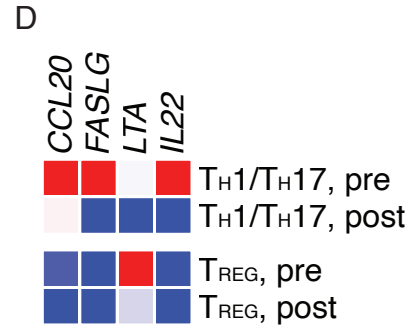

column min  column max

Supplement: izad084_suppl_supplementary_figure_s3.pdf [file izad084_suppl_supplementary_figure_s3.pdf]
